# Supplementary material
Source: publisher figshare collection journal article supplement (https://brill.figshare.com/articles/dataset/_/24003873)
Supplement: Supplementary file 1 [file 1]

## **Socio-economic analysis of edible insect species collectors and vendors in Nagaland, North-East India**

*L. Mozhui<sup>1</sup>, L.N. Kakati<sup>2\*</sup>, B. Ao<sup>1</sup>, V. Kezo<sup>3</sup> and V.B. Meyer-Rochow<sup>4</sup>*

<sup>1</sup>Department of Zoology, Nagaland University, Lumami 798627, Nagaland, India;

<sup>2</sup>Faculty of Science, Assam Down Town University, Panikhaiti, Guwahati-26,

Guwahati, Assam, India; <sup>3</sup>Department of Zoology, Kohima Science College, Jotsoma,

Kohima 797002, Nagaland, India; <sup>4</sup>Department of Ecology and Genetics, University of

Oulu, 90014 Oulu, Finland; \*lakhmi.kakati1956@gmail.com

### **Supplementary material**

FIGURE S1    Semi-domestication of *Apis cerana indica* and *Samia cynthia ricini*

FIGURE S    Photographs of different local markets in Nagaland
